# Supplementary material for: Development of Japanese utility weights for the Adult Social Care Outcomes Toolkit (ASCOT) SCT4
Source: PubMed Central journal article supplement (PMC6962125; doi:10.1007/s11136-019-02287-6), 2019-09-04
Supplement: 11136_2019_2287_MOESM1_ESM.pdf [file 11136_2019_2287_MOESM1_ESM.pdf]

## 自己記入式4択質問票(SCT4)

以下の設問について、4つの選択肢から、今のあなたの気持ちに最も近いものを選んでください。

1. あなたは日常生活において自分のことを、どのくらい自分で決められていますか。決めたことを他の人にやってもらう場合も含めてお答えください。

1つに印をつけて下さい。

|                      |                          |
|----------------------|--------------------------|
| 思い通り好きなように自分で決められている | <input type="checkbox"/> |
| おおむね自分で決められている       | <input type="checkbox"/> |
| あまり自分で決められない         | <input type="checkbox"/> |
| まったく自分で決められない        | <input type="checkbox"/> |

2. 身だしなみについて、あなたの状況を表しているのはどれですか。

1つに印をつけて下さい。

|                                    |                          |
|------------------------------------|--------------------------|
| 清潔で、思い通りの見苦しくない身だしなみができていると感じる     | <input type="checkbox"/> |
| おおむね清潔で、見苦しくない身だしなみができていると感じる      | <input type="checkbox"/> |
| あまり清潔ではない、または十分な身だしなみができていないと感じる   | <input type="checkbox"/> |
| まったく清潔ではない、またはまったく身だしなみができていないと感じる | <input type="checkbox"/> |

3. 飲食について、あなたの状況を表しているのはどれですか。

1つに印をつけて下さい。

|                                                 |                          |
|-------------------------------------------------|--------------------------|
| 十分な量や自分の食べたいものを、思い通りの時間にとれている                   | <input type="checkbox"/> |
| 不足ない量をおおむね適切な時間にとれている                           | <input type="checkbox"/> |
| 量や時間が適切でないことがある                                 | <input type="checkbox"/> |
| 十分な量をとれなかったり、適切な時間にとれないことがある。そのため、自分の健康に悪いと感じる。 | <input type="checkbox"/> |

4. あなたは虐待や転倒などのおそれがなく、どのくらい安心・安全だと感じていますか。

1つに印をつけて下さい。

|                              |                          |
|------------------------------|--------------------------|
| 十分に安心・安全だと感じている              | <input type="checkbox"/> |
| おおむね安心・安全だと感じているが、満足いくほどではない | <input type="checkbox"/> |
| あまり安心・安全ではないと感じている           | <input type="checkbox"/> |
| まったく安心・安全ではないと感じている          | <input type="checkbox"/> |

## 自己記入式4択質問票(SCT4)

5. あなたが望む人とのつき合いについて、あなたの状況を表しているのはどれですか。

1つに印をつけて下さい。

- |                               |                          |
|-------------------------------|--------------------------|
| 自分が望む人とのつき合いが、思い通りにできている      | <input type="checkbox"/> |
| 人とのつき合いが、おおむねできている            | <input type="checkbox"/> |
| 人とのつき合いはあるが、十分に満足いくほどではない     | <input type="checkbox"/> |
| 人とのつき合いがほとんどなく、社会的に孤立していると感じる | <input type="checkbox"/> |

6. あなたは大切だと思うことや楽しんでいることをしながら、自分の時間を過ごせていますか。趣味、仕事、ボランティア、他者のケアなどを含めて考えてください。

1つに印をつけて下さい。

- |             |                          |
|-------------|--------------------------|
| 思い通りに過ごせている | <input type="checkbox"/> |
| おおむね過ごせている  | <input type="checkbox"/> |
| あまり過ごしていない  | <input type="checkbox"/> |
| まったく過ごしていない | <input type="checkbox"/> |

7. あなたの家の中はどのくらい快適ですか。

1つに印をつけて下さい。

- |                |                          |
|----------------|--------------------------|
| 家の中は、思い通り快適である | <input type="checkbox"/> |
| 家の中は、おおむね快適である | <input type="checkbox"/> |
| 家の中は、あまり快適でない  | <input type="checkbox"/> |
| 家の中は、まったく快適でない | <input type="checkbox"/> |

## 自己記入式4択質問票(SCT4)

8. ケアや支援を受けることを、あなたはどのように感じていますか。

1つに印をつけて下さい。

- |                                  |                          |
|----------------------------------|--------------------------|
| ケアや支援を受けることで、今の自分をより良く思える        | <input type="checkbox"/> |
| ケアや支援を受けることは、自分が自分をどう感じるかとは関係がない | <input type="checkbox"/> |
| ケアや支援を受けることで、気持ちが傷つくことがある        | <input type="checkbox"/> |
| ケアや支援を受けることで、気持ちがひどく傷ついている       | <input type="checkbox"/> |

9. ケアや支援のされ方について、あなたはどのように感じていますか。

1つに印をつけて下さい。

- |                                |                          |
|--------------------------------|--------------------------|
| ケアや支援のされ方により、今の自分をより良く思える      | <input type="checkbox"/> |
| ケアや支援のされ方は、自分が自分をどう感じるかとは関係がない | <input type="checkbox"/> |
| ケアや支援のされ方により、気持ちが傷つくことがある      | <input type="checkbox"/> |
| ケアや支援のされ方により、気持ちがひどく傷ついている     | <input type="checkbox"/> |

---

(c) PSSRU at the University of Kent

This questionnaire has been developed by members of the Personal Social Services Research Unit (PSSRU) at the University of Kent at Canterbury, United Kingdom (UK). The work has been substantially funded by the Quality and Outcomes of Person-Centred Care Research Unit (QORU) under the Policy Research Programme in the UK Department of Health. The views expressed are not necessarily those of the Department. The University of Kent is the sole owner of the copyright in these materials. The University of Kent authorises non-commercial use of this questionnaire on the condition that anyone who uses it contacts the ASCOT team ([ascot@kent.ac.uk](mailto:ascot@kent.ac.uk)) to discuss this use and enable the PSSRU at University of Kent to track authorised non-commercial use. The University of Kent does not authorise commercial use of this questionnaire. Anyone wishing to obtain a licence for commercial use of any of the ASCOT materials should contact the ASCOT team, who will put them in touch with Kent Innovation & Enterprise.
